# Supplementary material for: Predictions of success in organic chemistry based on a mathematics skills test and academic achievement
Source: Royal Society of Chemistry journal article supplement (doi:10.1039/d2rp00140c), 2022-10-04
Supplement: d2rp00140c1.xlsx [file d2rp00140c1.xlsx]

## Sheet: Description of Variables
	Variable	Description
	Exam 1	Score (out of 100) on the first exam of the semester
	OverallAvg	Semester grade for participants who completed the semester. Top four semester exams, 15% each; lowest semester exam, 10%; final exam, 20%; homework, 5%; participation, 5%
	Avgattimeofdrop	Course grade student was earning at the time of withdrawal
	SciGPA	grade point average (4.0 scale) of general chemistry lecture and lab courses and general biology lecture and lab courses
	Successful	1 = Completed semester with ≥ 69.5%; 0 = Completed semester with < 69.5% or withdrew
	First	1 = First-time enrollee in OChem; 0 = Repeating course after a previous unsuccessful attempt

## Sheet: Participant Data
Student	Exam1	OverallAvg	Avgattimeofdrop	SciGPA	MUSTSum	First	SuccessfulUnsuccessful
2019OR1	85	80.3		3.81	16	1	1
2019OR2	79	67.6			13	0	0
2019OR3	90	77.3			13	0	1
2019OR4	91.5	87.6		3.94	16	1	1
2019OR5	90	85.4			5	0	1
2019OR6	87	83.1		3.63	15	1	1
2019OR7	88	76.4		3.92	19	1	1
2019OR8	78	84.8		3.88	14	1	1
2019OR9	85	73.8		3.38	16	1	1
2019OR10	74	72.5		3.38	7	1	1
2019OR11	85	79.8		3.38	16	1	1
2019OR12	74	79.7		3.81	6	1	1
2019OR13	22.5		27	1.64	5	1	0
2019OR14	79.5	71.2			4	0	1
2019OR15	71.5	68.8			7	0	0
2019OR16	55.5	59.6			3	0	0
2019OR17	93	82.1		3.56	19	1	1
2019OR18	63		66	3.25	8	1	0
2019OR19	85	79.2		3.56	13	1	1
2019OR20	58.5		57	2.81	13	1	0
2019OR21	49.5		48	2.69	13	1	0
2019OR22	36	31.8		1.25	2	1	0
2019OR23	56.5	50.9		3.25	15	1	0
2019OR24	93	84.1			10	0	1
2019OR25	78	77.7		3.44	5	1	1
2019OR26	66		66	2.63	9	1	0
2019OR27	86	70.6			16	0	1
2019OR28	70	79.4		3.94	7	1	1
2019OR29	87.5	81.5		3.63	18	1	1
2019OR30	81	75.5		3.81	15	1	1
2019OR31	81.5	78.7		2.81	4	1	1
2019OR32	80	74.7		3.38	12	1	1
2019OR33	64	69.5			9	1	1
2019OR34	72.5	69.7		2.25	16	1	1
2019OR35	89	84.3		3.81	18	1	1
2019OR36	61.5		52	2.25	2	1	0
2019OR37	67		60	2.25	11	1	0
2019OR38	76.5	81.5		3.63	13	1	1
2019OR39	65.5	57.8		3.63	12	1	0
2019OR40	58		60	2.5	7	1	0
2019OR41	89	90.7		4	14	1	1
2019OR42	85.5	62.3			10	0	0
2019OR43	36.5		41.88	2.58	8	1	0
2019OR44	75	69.9			1	0	1
2019OR45	96	90.9		3.44	11	1	1
2019OR46	89.5	72.1		3.5	19	1	1
2019OR47	77.5	63.9			4	0	0
2019OR48	24		24.53		1	1	0
2019OR49	61.5		53.95	2	5	1	0
2019OR50	58		56.76	2.57	8	1	0
2019OR51	56.5		51.88		6	0	0
2019OR52	83.5	80.2		3.25	11	1	1
2019OR53	61.5		60.16	1.75	5	1	0
2019OR54	90	89		3.69	8	1	1
2019OR55	73	63.6		2.07	10	1	0
2019OR56	92.5	76.1			9	0	1
2019OR57	49.5		51.95	2.4	13	1	0
2019OR58	70.5	53.7		2.31	15	1	0
2019OR59	83	72			4	0	1
2019OR60	96.5	94.5		4	17	1	1
2019OR61	73.5	61.4			3	0	0
2019OR62	69.5	69.8		3.13	16	1	1
2019OR63	80	74.9		3.13	16	1	1
2019OR64	65.5	73.5		2.47	12	1	1
2019OR65	68.5	60.9		2.07	9	1	0
2019OR66	81	73.1		2.38	15	1	1
2019OR67	84	67		2.55	9	1	0
2019OR68	77	63.9			7	0	0
2019OR69	85.5	93.2		4	19	1	1
2019OR70	71	68.6		3.31	16	1	0
2019OR71	41.5		33.87	1.48	6	1	0
2019OR72	57.5		60.7	2.63	9	1	0
2019OR73	32		47	2.25	5	1	0
2019OR74	92	86.5		2.5	14	0	1
2019OR75	87.5	83.6		3.56	18	1	1
2019OR76	88	84.5		2.94	16	1	1
2019OR77	49		57.11	2.2	5	1	0
2020OR1	71.5	73.1432			13	0	1
2020OR2	89.5	94.888		4	20	1	1
2020OR3	81.5	78.5689		2.53	9	1	1
2020OR4	84.5	84.3858		2.73	11	1	1
2020OR5	96.5	85.8936		3.38	20	1	1
2020OR6	98	89.4102		4	16	1	1
2020OR7	95	94.557		4	17	1	1
2020OR8	96	90.929		3.81	20	1	1
2020OR9	52.5	44.8007		1.95	6	1	0
2020OR10	77	73.417		3.4	5	1	1
2020OR11	65.5	65.6822		2.63	13	1	0
2020OR12	90.5	86.4185		3.81	18	1	1
2020OR13	78.5	65.6631		2.27	8	1	0
2020OR14	89.5	83.0306		3.19	8	1	1
2020OR15	89.5	91.7532		4	12	1	1
2020OR16	73	72.0032		3.56	13	1	1
2020OR17	64.5	66.5459		2.58	5	1	0
2020OR18	63	69.101		2.5	11	1	0
2020OR19	42	47.6908		1	3	1	0
2020OR20	84.5	91.3607		3.63	13	1	1
2020OR21	67	71.7118		3.63	18	1	1
2020OR22	89.5	88.3685		4	16	1	1
2020OR23	68	72.3045		2.69	6	1	1
2020OR24	91.5	88.8773		3.81	19	1	1
2020OR25	81.5	85.9858		3.63	15	1	1
2020OR26	96	87.623		3.38	15	1	1
2020OR27	89	75.3389		2.88	11	1	1
2020OR28	78		63.18	3.31	12	1	0
2020OR29	36		24.8	2.23	8	1	0
2020OR30	40	52.1		2.07	11	1	0
2020OR31	71	77.2		3.44	9	1	1
2020OR32	92.5	92.4		4	19	1	1
2020OR33	94.5	91.6		3.75	12	1	1
2020OR34	79	87.4		3.63	15	1	1
2020OR35	66.5	68.2		2.77	12	1	0
2020OR36	84.5	77			10	0	1
2020OR37	81.5	76.1			5	0	1
2020OR38	58	62.7		2.5	9	1	0
2020OR39	66.5	79.6		3.56	12	1	1
2020OR40	66	61.8			5	0	0
2020OR41	96	91.3		4	20	1	1
2020OR42	81.5	65		3.22	18	1	0
2020OR43	97.5	92.5		3.81	16	1	1
2020OR44	68.5		54.5	2.67	7	1	0
2020OR45	81	87.4		3.75	12	1	1
2020OR46	41.5	36		1.42	7	1	0
2020OR47	89	95.3		4	18	1	1
2020OR48	91	82.3		4	12	1	1
2020OR49	76	72.5		3.13	7	1	1
2020OR50	63.5		58.5	2.85	13	1	0
2020OR51	63	50.9			9	0	0
2020OR52	95	97.5		4	17	1	1
2020OR53	87.5	82.6		4	16	1	1
2020OR54	60		56.9	2.81	4	1	0
2020OR55	64	69		2.9	7	1	0
2020OR56	39		42.4	2.56	9	1	0
2020OR57	51.5		42.1	2	7	1	0
2020OR58	91.5	83.9		4	15	1	1
2020OR59	87.5	82.9		3.81	15	1	1
2020OR60	95	91.9		3.13	20	1	1
2020OR61	78	71.4		3.5	14	1	1
2020OR62	71	67.8			10	0	0
2020OR63	85	81.4			20	0	1
2020OR64	75.5	76.8		3.38	13	1	1
2020OR65	87	85.1		3.5	9	1	1
2020OR66	75	82.4		3.63	12	1	1
2020OR67	83.5		71.5		13	1	0
2020OR68	55.5		54.3	2.5	6	1	0
2020OR69	70.5		60.8		9	1	0
2020OR70	80.5	82.1		3.63	9	1	1
2020OR71	57		46.1		6	1	0
2020OR72	75	73.6			7	0	1
2020OR73	82.5	76.2			5	0	1
